# Supplementary material
Source: publisher figshare collection journal article supplement (https://springernature.figshare.com/ndownloader/files/14014058)
Supplement: Supplementary file [file 14014058]

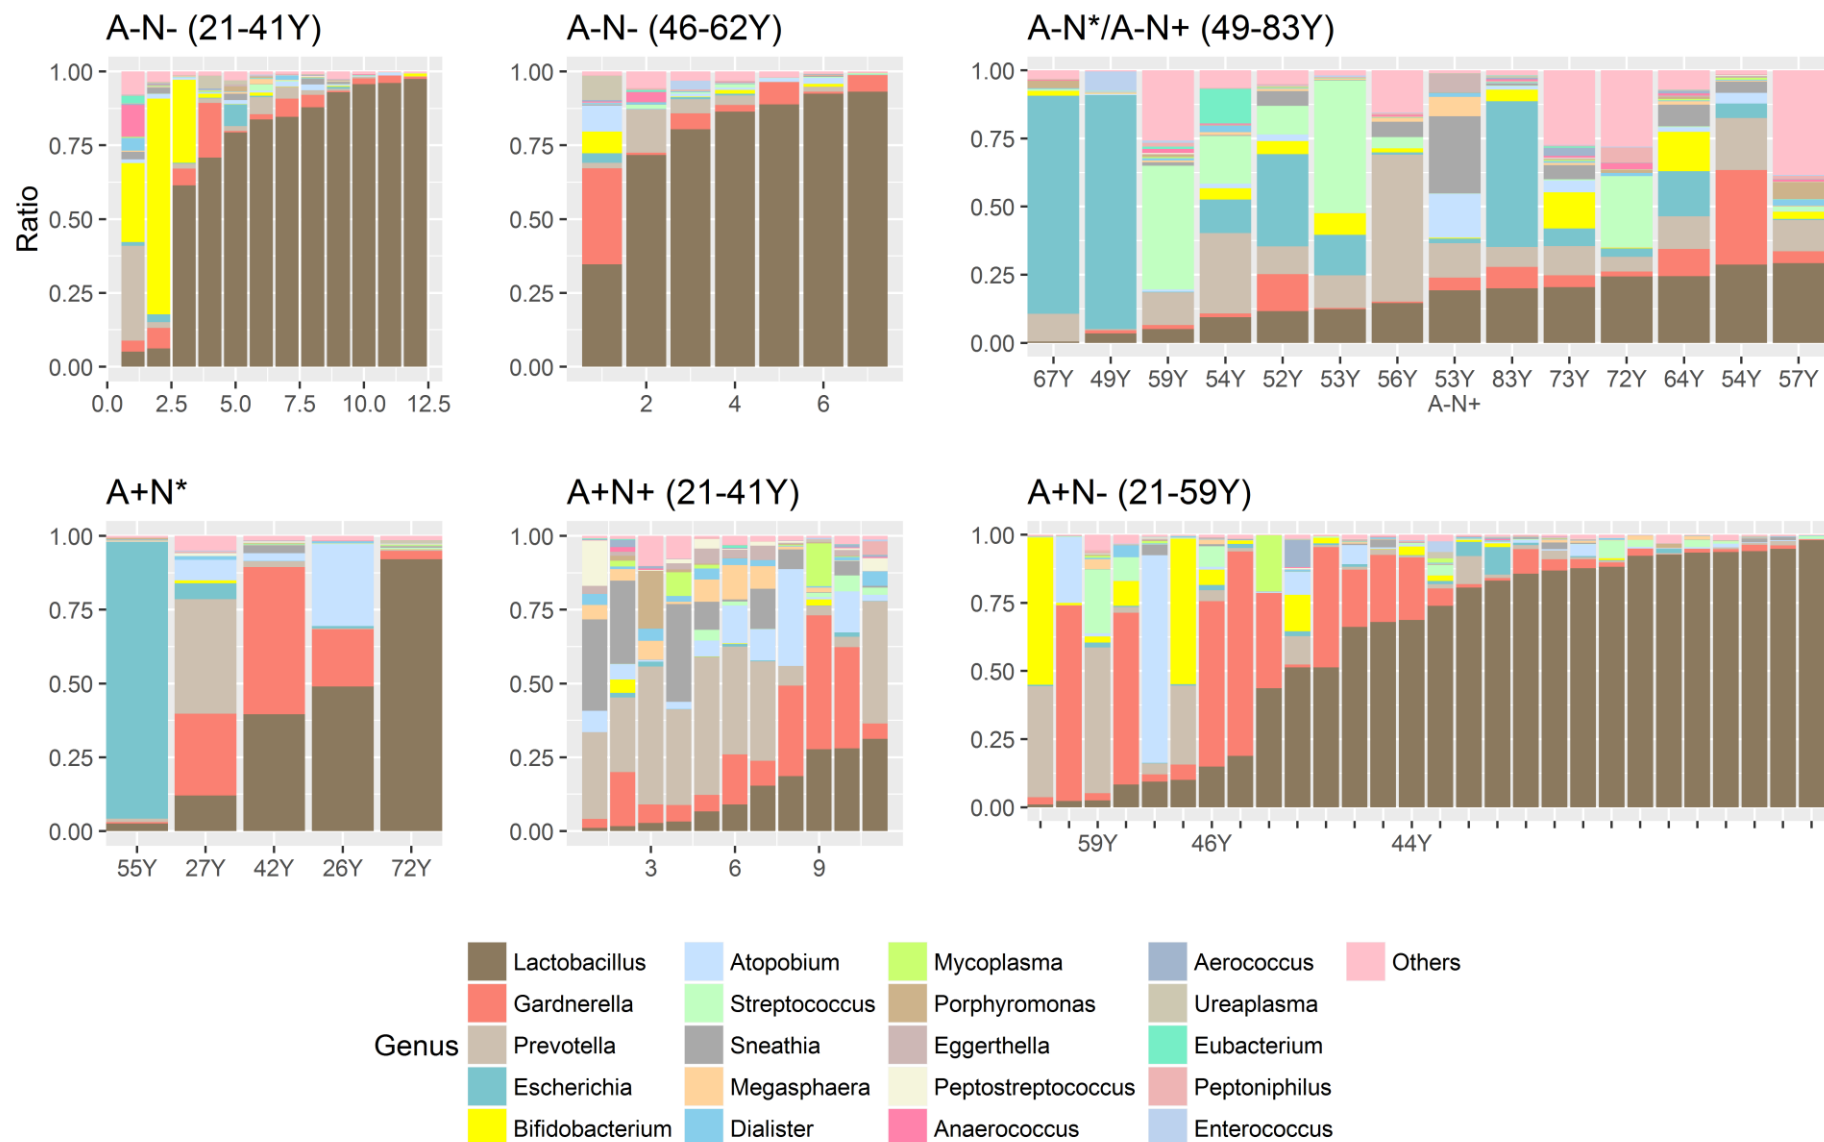

**Figure S6. Distribution of the most abundant taxa across samples .** Each color represents one bacterial genus, and relative abundances of taxa are represented as bar-charts for each individual sample. There is only one sample in the A–N+ Group.
